# Supplementary material for: Targeted tandem affinity purification of PSD-95 recovers core postsynaptic complexes and schizophrenia susceptibility proteins
Source: PubMed Central journal article supplement — Mol Syst Biol. 2009 May 19;5:269. doi: 10.1038/msb.2009.27 (PMC2694677; doi:10.1038/msb.2009.27), 2009-05-19
Supplement: msb200927-s8.pdf [file msb200927-s8.pdf]

## Supplementary Table 7

### Primers

---

**XbaI HATF1**

5'-CGGCGCTCTAGAAAGGATCATCTCATCCACAATGTCC

**HATR1**

5'TGCTGCTGCCGTTGGGAGCTCACCCCTGAAAATACAAATTCTCGATCTTGTGTGGGGCATGA  
GCG

**F1Flag**

5'-GAGAATTTGTATTTTCAGGGTGAGCTCCCAACGGCAGCAGACTACAAAGACCATGACGGTG

**BclI FlagR1**

5'-GTCGGTACTTATCGTCTCTTGTGCATACACCGTTGATCAC

**Psd95HAXhoIF**

5'-GCCACATCTGTAACTCCGCTCGAGGCCGTGAG

**Psd95HAXbaIR**

5'CTGCTCTAGACCGAGTCTCTCTCGGGCTGGGA

**Psd95HAAcc65IF**

5'-GCCTGGCTTGGCCTG'CTACGGGGTACCTTCCTGC

**Psd95HABgIIIR**

5'-GACCTAGATCTGCGGCCGCACGGGGGGACCGGTGGGAGGTGTGTGAAAG

**Psd95HANdeIF**

5'-GGGTAATCTCCAGGCAAGAGTTTTATGCCCACTTCCCCTTTCT

**Psd95HAPmlIR**

5'-GAGAGAGCCAGAGCCAGGCTCAGCCAAGTGCCGGCGTACAC

**Psd95HAAscIF**

5'CATTTGGCGCGCCGGGGAAGTCGGACATGCCATCCAAC

**Psd95HAPmeIR**

5'-CGTCACAAGCATCTGTAATCCTAGCTTTGTTTAAACCCAGC5'

**Psd95F5**

5'-GGTCCCAGCCCGAGAGAGACTC

**pneoR4**

5'-CGTCCTGCACGACGCGAGCTGC

**pneoF3**

5'-GCCTCTGAGCTATTCCAGAAGTAG

**Psd95R3**

5'-CCTTGGTGTATGCACACATGC

**Psd95R6**

5'-GGCGGCAGCATTTCCTGTCCTC

---
